# Supplementary material for: Effects of Lewis acid strength of monovalent coinage metals and zeolite frameworks on catalytic CO2 cycloaddition with ethylene oxide: A DFT study
Source: Royal Society of Chemistry journal article supplement (doi:10.1039/d3nj01581e), 2023-01-01
Supplement: d3nj01581e1.pdf [file d3nj01581e1.pdf]

## Effects of Lewis acid strength of monovalent coinage metals and zeolite frameworks on catalytic CO<sub>2</sub> cycloaddition with ethylene oxide: A DFT study

Winyoo Sangthong<sup>a,b</sup> and Jakkapan Sirijaraensre<sup>b,c\*</sup>

---

<sup>a</sup> *Research Network of NANOTEC–KU on NanoCatalysts and NanoMaterials for Sustainable Energy and Environment, Kasetsart University, Bangkok 10900, Thailand*

<sup>b</sup> *Center for Advanced Studies in Nanotechnology for Chemical, Food, and Agricultural Industries, Kasetsart University Institute for Advanced Studies, Kasetsart University, Bangkok 10900, Thailand*

<sup>c</sup> *Department of Chemistry, Faculty of Science, Kasetsart University, Bangkok 10900, Thailand. E-mail: fscijkp@ku.ac.th*

**Table S1.** Optimized geometrical parameters and NBO charge for the species involved in the CO<sub>2</sub> cycloaddition with EO on Cu(I)-, Ag(I)-, and Au(I)-FAU zeolites with the atomic labels based on the TS structure in the inset figure.

| Parameters                         | Cu(I)-FAU |        |       |       | Ag(I)-FAU |        |       |       | Au(I)-FAU |        |       |       |
|------------------------------------|-----------|--------|-------|-------|-----------|--------|-------|-------|-----------|--------|-------|-------|
|                                    | Isolated  | EO_ADS | TS    | PROD  | Isolated  | EO_ADS | TS    | PROD  | Isolated  | EO_ADS | TS    | PROD  |
| <b>Distances (Å)</b>               |           |        |       |       |           |        |       |       |           |        |       |       |
| C1-C2                              | 1.46      | 1.46   | 1.45  | 1.52  | 1.46      | 1.46   | 1.44  | 1.53  | 1.46      | 1.46   | 1.45  | 1.52  |
| C1-O1                              | 1.42      | 1.44   | 1.35  | 1.44  | 1.42      | 1.43   | 1.33  | 1.44  | 1.42      | 1.46   | 1.36  | 1.45  |
| C2-O1                              | 1.42      | 1.43   | 2.37  | 2.32  | 1.42      | 1.43   | 2.33  | 2.32  | 1.42      | 1.45   | 2.38  | 2.33  |
| C2-O2                              | -         | -      | 1.93  | 1.44  | -         | -      | 2.04  | 1.44  | -         | -      | 1.98  | 1.44  |
| C3-O1                              | -         | -      | 2.43  | 1.34  | -         | -      | 2.30  | 1.34  | -         | -      | 2.44  | 1.32  |
| C3-O2                              | 1.17      | -      | 1.20  | 1.33  | 1.17      | -      | 1.20  | 1.33  | 1.17      | -      | 1.20  | 1.33  |
| C3-O3                              | 1.17      | -      | 1.16  | 1.22  | 1.17      | -      | 1.16  | 1.21  | 1.17      | -      | 1.16  | 1.23  |
| M-O1                               | -         | 2.05   | 1.91  | -     | -         | 2.37   | 2.22  | -     | -         | 2.15   | 2.07  | -     |
| M-O3                               | -         | -      | -     | 1.99  | -         | -      | -     | 2.39  | -         | -      | -     | 2.14  |
| <b>Metal-zeolite distances (Å)</b> |           |        |       |       |           |        |       |       |           |        |       |       |
| M-Al                               | 2.86      | 2.88   | 2.89  | 2.81  | 3.18      | 3.19   | 3.15  | 3.17  | 3.09      | 3.04   | 3.15  | 3.17  |
| M-Oa                               | 2.11      | 2.37   | 2.66  | 2.40  | 2.38      | 2.51   | 2.57  | 2.51  | 2.34      | 3.26   | 3.25  | 3.30  |
| M-Ob                               | 2.46      | 2.46   | 2.55  | 2.26  | 2.75      | 2.74   | 2.67  | 2.71  | 2.81      | 2.93   | 3.03  | 3.07  |
| M-Oc                               | 2.02      | 2.04   | 1.99  | 2.12  | 2.28      | 2.33   | 2.38  | 2.35  | 2.21      | 2.14   | 2.18  | 2.16  |
| <b>Angle (°)</b>                   |           |        |       |       |           |        |       |       |           |        |       |       |
| C2-O2-C3                           | -         | -      | 117.2 | 108.9 | -         | -      | 113.0 | 109.3 | -         | -      | 117.2 | 108.8 |
| C2-C1-O1                           | 59.1      | 59.3   | 115.6 | 102.9 | 59.1      | 59.4   | 114.1 | 103.0 | 59.1      | 59.9   | 116.4 | 102.9 |
| O1-C3-O2                           | -         | -      | 93.4  | 112.7 | -         | -      | 94.9  | 112.2 | -         | -      | 92.6  | 113.6 |
| O1-C3-O3                           | -         | -      | 102.2 | 124.3 | -         | -      | 100.9 | 123.1 | -         | -      | 100.4 | 125.1 |
| O2-C3-O3                           | -         | -      | 164.1 | 123.0 | -         | -      | 164.2 | 124.7 | -         | -      | 167.0 | 121.3 |
| M-O3-C3                            | -         | -      | -     | 126.8 | -         | -      | -     | 111.2 | -         | -      | -     | 129.3 |
| <b>NBO charge (e)</b>              |           |        |       |       |           |        |       |       |           |        |       |       |
| M                                  | +0.73     | +0.69  | +0.60 | +0.68 | +0.76     | +0.74  | +0.72 | +0.72 | +0.61     | +0.56  | +0.46 | +0.59 |
| EO                                 | 0.00      | +0.06  | +0.02 | -     | 0.00      | +0.05  | -0.01 | -     | 0.00      | +0.15  | +0.11 | -     |
| CO <sub>2</sub>                    | 0.00      | -      | +0.13 | -     | 0.00      | -      | +0.09 | -     | 0.00      | -      | +0.14 | -     |
| EC                                 | 0.00      | -      | -     | +0.09 | 0.00      | -      | -     | +0.07 | 0.00      | -      | -     | +0.15 |

**Table S2.** Calculated Wiberg bond order for the species involved in the CO<sub>2</sub> cycloaddition with EO on Cu(I)-, Ag(I)-, and Au(I)-FAU zeolites.

| Parameters                               | Cu(I)-FAU |        |       |       | Ag(I)-FAU |        |       |       | Au(I)-FAU |        |       |       |
|------------------------------------------|-----------|--------|-------|-------|-----------|--------|-------|-------|-----------|--------|-------|-------|
|                                          | Isolated  | EO_ADS | TS    | PROD  | Isolated  | EO_ADS | TS    | PROD  | Isolated  | EO_ADS | TS    | PROD  |
| <b>Wiberg bond order</b>                 |           |        |       |       |           |        |       |       |           |        |       |       |
| C1-C2                                    | 1.022     | 1.025  | 1.138 | 1.012 | 1.022     | 1.025  | 1.163 | 1.010 | 1.022     | 1.031  | 1.156 | 1.011 |
| C1-O1                                    | 0.928     | 0.866  | 1.062 | 0.863 | 0.928     | 0.882  | 1.093 | 0.864 | 0.928     | 0.849  | 1.037 | 0.852 |
| C2-O1                                    | 0.928     | 0.874  | 0.153 | 0.015 | 0.928     | 0.885  | 0.188 | 0.014 | 0.928     | 0.849  | 0.133 | 0.014 |
| C2-O2                                    | -         | -      | 0.333 | 0.867 | -         | -      | 0.266 | 0.869 | -         | -      | 0.301 | 0.865 |
| C3-O1                                    | -         | -      | 0.112 | 1.051 | -         | -      | 0.122 | 1.026 | -         | -      | 0.093 | 1.089 |
| C3-O2                                    | 1.888     | -      | 1.593 | 1.062 | 1.888     | -      | 1.633 | 1.054 | 1.888     | -      | 1.630 | 1.081 |
| C3-O3                                    | 1.888     | -      | 1.995 | 1.565 | 1.888     | -      | 1.976 | 1.626 | 1.888     | -      | 2.001 | 1.509 |
| M-O1                                     | -         | 0.152  | 0.316 | -     | -         | 0.102  | 0.176 | -     | -         | 0.274  | 0.438 | -     |
| M-O3                                     | -         | -      | -     | 0.196 | -         | -      | -     | 0.111 | -         | -      | -     | 0.260 |
| <b>Wiberg bond order (Metal-zeolite)</b> |           |        |       |       |           |        |       |       |           |        |       |       |
| M-Al                                     | 0.032     | 0.031  | 0.037 | 0.033 | 0.018     | 0.020  | 0.021 | 0.020 | 0.033     | 0.044  | 0.034 | 0.033 |
| M-Oa                                     | 0.138     | 0.085  | 0.056 | 0.085 | 0.085     | 0.062  | 0.056 | 0.069 | 0.158     | 0.018  | 0.018 | 0.017 |
| M-Ob                                     | 0.061     | 0.076  | 0.079 | 0.118 | 0.051     | 0.052  | 0.060 | 0.059 | 0.050     | 0.034  | 0.029 | 0.031 |
| M-Oc                                     | 0.189     | 0.172  | 0.211 | 0.157 | 0.129     | 0.111  | 0.089 | 0.104 | 0.263     | 0.329  | 0.276 | 0.311 |

**Table S3.** Optimized geometrical parameters and NBO charge for the species involved in the CO<sub>2</sub> cycloaddition with EO on Na-FAU zeolite with the atomic labels based on the TS structure in the inset figure.

| Parameters                      | Isolated | EO_ADS | TS    | PROD  |
|---------------------------------|----------|--------|-------|-------|
| <b>Distances (Å)</b>            |          |        |       |       |
| C1-C2                           | 1.46     | 1.46   | 1.43  | 1.52  |
| C1-O1                           | 1.42     | 1.43   | 1.32  | 1.44  |
| C2-O1                           | 1.42     | 1.43   | 2.33  | 2.32  |
| C2-O2                           | -        | -      | 2.11  | 1.44  |
| C3-O1                           | -        | -      | 2.07  | 1.35  |
| C3-O2                           | 1.17     | -      | 1.20  | 1.34  |
| C3-O3                           | 1.17     | -      | 1.18  | 1.21  |
| Na-O1                           | -        | 2.31   | 2.25  | -     |
| Na-O3                           | -        | -      | -     | 2.30  |
| <b>Na-zeolite distances (Å)</b> |          |        |       |       |
| Na-Al                           | 3.12     | 3.12   | 3.09  | 3.09  |
| Na-Oa                           | 2.34     | 2.40   | 2.47  | 2.45  |
| Na-Ob                           | 2.64     | 2.63   | 2.58  | 2.60  |
| Na-Oc                           | 2.24     | 2.27   | 2.31  | 2.27  |
| <b>Angle (°)</b>                |          |        |       |       |
| C2-O2-C3                        | -        | -      | 108.1 | 109.2 |
| C2-C1-O1                        | 59.1     | 59.4   | 115.8 | 102.9 |
| O1-C3-O2                        | -        | -      | 101.6 | 112.0 |
| O1-C3-O3                        | -        | -      | 102.2 | 123.1 |
| O2-C3-O3                        | -        | -      | 156.2 | 124.9 |
| Na-O3-C3                        | -        | -      | -     | 116.9 |
| <b>NBO charge (e)</b>           |          |        |       |       |
| Na                              | +0.95    | +0.94  | +0.93 | +0.94 |
| EO                              | 0.00     | +0.01  | +0.04 | -     |
| CO <sub>2</sub>                 | 0.00     | -      | -0.03 | -     |
| EC                              | 0.00     | -      | -     | +0.01 |

**Table S4.** Optimized geometrical parameters and NBO charge for the species involved in the CO<sub>2</sub> cycloaddition with EO on Au(I)-ZSM-5 and Au(I)-BEA zeolites with the atomic labels based on TS structure in the inset figure.

| Parameters                      | Au(I)-ZSM-5 |        |       |       | Au(I)-BEA |        |       |       |
|---------------------------------|-------------|--------|-------|-------|-----------|--------|-------|-------|
|                                 | Isolated    | EO_ADS | TS    | PROD  | Isolated  | EO_ADS | TS    | PROD  |
| <b>Distances (Å)</b>            |             |        |       |       |           |        |       |       |
| C1-C2                           | 1.46        | 1.45   | 1.46  | 1.52  | 1.46      | 1.46   | 1.45  | 1.52  |
| C1-O1                           | 1.42        | 1.46   | 1.36  | 1.44  | 1.42      | 1.45   | 1.35  | 1.45  |
| C2-O1                           | 1.42        | 1.46   | 2.40  | 2.30  | 1.42      | 1.46   | 2.39  | 2.31  |
| C2-O2                           | -           | -      | 1.94  | 1.45  | -         | -      | 1.95  | 1.45  |
| C3-O1                           | -           | -      | 2.52  | 1.32  | -         | -      | 2.63  | 1.33  |
| C3-O2                           | 1.17        | -      | 1.20  | 1.32  | 1.17      | -      | 1.19  | 1.33  |
| C3-O3                           | 1.17        | -      | 1.16  | 1.23  | 1.17      | -      | 1.16  | 1.23  |
| Au-O1                           | -           | 2.16   | 2.06  | -     | -         | 2.16   | 2.07  | -     |
| Au-O3                           | -           | -      | -     | 2.19  | -         | -      | -     | 2.16  |
| <b>Au-zeolite distances (Å)</b> |             |        |       |       |           |        |       |       |
| Au-Al                           | 3.15        | 3.11   | 3.09  | 3.07  | 3.08      | 3.09   | 3.17  | 3.15  |
| Au-Oa                           | 2.30        | 2.15   | 2.18  | 2.18  | 2.40      | 2.15   | 2.17  | 2.16  |
| Au-Ob                           | 2.35        | 2.69   | 3.19  | 2.75  | 2.36      | 2.78   | 2.98  | 2.90  |
| <b>Angle (°)</b>                |             |        |       |       |           |        |       |       |
| C2-O2-C3                        | -           | -      | 118.3 | 107.7 | -         | -      | 116.4 | 108.1 |
| C2-C1-O1                        | 59.1        | 60.1   | 116.9 | 101.9 | 59.1      | 60.1   | 116.9 | 102.3 |
| O1-C3-O2                        | -           | -      | 92.2  | 113.4 | -         | -      | 88.7  | 113.4 |
| O1-C3-O3                        | -           | -      | 97.9  | 123.1 | -         | -      | 99.0  | 123.9 |
| O2-C3-O3                        | -           | -      | 169.4 | 123.5 | -         | -      | 172.1 | 122.7 |
| Au-O3-C3                        | -           | -      | -     | 106.9 | -         | -      | -     | 118.2 |
| <b>NBO charge (e)</b>           |             |        |       |       |           |        |       |       |
| Au                              | +0.72       | +0.57  | +0.46 | +0.61 | +0.72     | +0.56  | +0.45 | +0.58 |
| EO                              | 0.00        | +0.15  | +0.11 | -     | 0.00      | +0.15  | +0.10 | -     |
| CO <sub>2</sub>                 | 0.00        | -      | +0.16 | -     | 0.00      | -      | +0.17 | -     |
| EC                              | 0.00        | -      | -     | +0.15 | 0.00      | -      | -     | +0.15 |

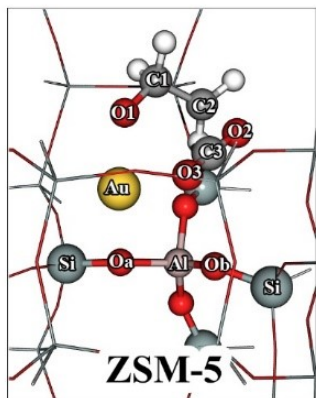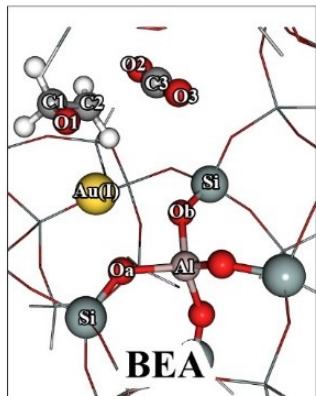

**Table S5.** Relative energies with respect to the reactants of the CO<sub>2</sub> cycloaddition with EO on Au(I)-exchanged zeolites calculated with the M06-L/6-31G(d,p) level of theory.

| Systems          | Relative energy (kcal/mol) |                      |                    |                      |                    |                      |
|------------------|----------------------------|----------------------|--------------------|----------------------|--------------------|----------------------|
|                  | Au(I)-FAU                  |                      | Au(I)-ZSM-5        |                      | Au(I)-BEA          |                      |
|                  | 30T<br>(Optimized)         | 6T<br>(Single point) | 34T<br>(Optimized) | 5T<br>(Single point) | 38T<br>(Optimized) | 5T<br>(Single point) |
| ADS              | -24.1                      | -19.0                | -34.5              | -29.0                | -32.7              | -29.3                |
| TS               | 10.0                       | 19.5                 | -8.7               | -0.1                 | -4.6               | 3.6                  |
| PROD             | -38.2                      | -28.8                | -47.5              | -41.9                | -49.6              | -41.2                |
| E <sub>a</sub>   | 34.1                       | 38.5                 | 25.8               | 28.9                 | 28.1               | 32.9                 |
| E <sub>des</sub> | 27.5                       | 18.2                 | 36.8               | 31.2                 | 39.0               | 30.6                 |
